# Supplementary material for: Gene Expression Profiling of Childhood Adrenocortical Tumors
Source: Oxford University Press journal article supplement (doi:10.1158/0008-5472.can-06-3767), 2007-01-15
Supplement: 00085472can063767-sup-cr_west_suppl_table_s1.xls [file 00085472can063767-sup-cr_west_suppl_table_s1.xls]

## Sheet: Sheet1
	Gene	Primer	Sequence	PCR Conditions
Set 1
	IGF-II	Forward	5'-CTTCTACTTCAGCAGGCCCG-3'	95ºC-3' - 1x
		Reverse	5'-TAGCACAGTACGTCTCCAGGA-3'	95ºC-10'', 61.2ºC-45'' - 40x
				95ºC-1', 55ºC-1' - 1x
	NOV	Forward	5'-CACGGCGGTAGAGGGAGATA-3'	55ºC-10"- 80x
		Reverse	5'-GGGTAAGGCCTCCCAGTGAA-3'
Set 2
	HSD3B2	Forward	5'-GCGGCTAATGGGTGGAATCTA-3'	95ºC-3' - 1x
		Reverse	5'-CATTGTTGTTCAGGGCCTCAT-3'	95ºC-10'', 64.3ºC-45'' - 38x
				95ºC-1', 55ºC-1' - 1x
	NR4A1	Forward	AAGCCACATTGTTGCCAAGACCTG	55ºC-10" - 80x
		Reverse	TGGTGTCCCATATTGGGCTTGGAT
	NR4A2	Forward	5'-GGCTTCTTTAAGCGCACAGTGCAA-3'
		Reverse	5'-TGAAATCGGCAGTACTGACAGCGA-3'
	FGFR4	Forward	TGATGGCCCAAATGTCAGGGTTCT
		Reverse	TTTAGCATAGCAGCTCTCCAGCCA
Table S1 West et al. qRT-PCR primer set sequences and PCR conditions. Primer sets 1 and 2 were run under separate conditions using a 2-step PCR protocol followed by a subsequent melt curve.
