# Supplementary material for: Gene Expression Profiling of Childhood Adrenocortical Tumors
Source: Oxford University Press journal article supplement (doi:10.1158/0008-5472.can-06-3767), 2007-01-15
Supplement: 00085472can063767-sup-cr_west_suppl_table_s3.xls [file 00085472can063767-sup-cr_west_suppl_table_s3.xls]

## Sheet: Giordano-SuppTable
Table S3 West et al.	Pediatric Tumor vs Normal (Zam) compared to Adult Tumor vs Normal (Gio)
	Gene	Probe Set ID	Ratio	95% CI		ZamLog2FC	GioLog2FC		Gene	Probe Set ID	Ratio	95% CI		ZamLog2FC	GioLog2FC
	IGF2	210881_s_at	18.3141	7.854	42.705	4.19488	105.6		KCNQ1	204487_s_at	85.4969	49.1881	148.607	-6.4178	-6.3
	IGF2	202410_x_at	15.9727	6.15923	41.4221	3.99754	105.6		HSD3B2	206294_at	41.0567	16.0935	104.741	-5.35955	-4.8
	CDC2	203213_at	13.7907	5.66429	33.576	3.78563	7.7		ADH1B	209613_s_at	21.5522	10.8554	42.7894	-4.42976	-16.7
	BARD1	205345_at	12.7836	8.63798	18.9189	3.67623	5.2		KCNQ1	211217_s_at	13.6466	6.4034	29.0827	-3.77046	-6.3
	TOP2A	201292_at	8.62704	3.24133	22.9615	3.10887	8.8		FBLN1	202994_s_at	13.2095	6.89076	25.3223	-3.7235	-9.1
	TOP2A	201291_s_at	8.58073	2.51212	29.3095	3.1011	8.8		PDGFRA	203131_at	13.0378	7.87389	21.5883	-3.70463	-5.9
	ANGPT2	205572_at	7.7435	2.73003	21.9638	2.95299	4.4		AADAC	205969_at	12.2011	5.36435	27.7513	-3.60894	-6.7
	FOXM1	202580_x_at	7.19454	2.15594	24.0087	2.8469	6.4		LMOD1	203766_s_at	9.96393	5.14964	19.279	-3.31671	-5.6
	TPX2	210052_s_at	6.79167	3.01622	15.2929	2.76377	15.6		AOX1	205083_at	9.79209	4.69238	20.4342	-3.29162	-6.7
	STK6	208079_s_at	6.15046	2.79407	13.5387	2.62069	4.7		SEMA3B	203071_at	8.89652	4.39841	17.9947	-3.15324	-10
	KIAA0101	202503_s_at	5.94084	3.666	9.62728	2.57067	28.2		SEMA6A	215028_at	8.67995	5.02686	14.9878	-3.11769	-3.7
	CDC2	203214_x_at	5.51564	2.22239	13.689	2.46353	7.7		ADH1B	209612_s_at	8.17757	4.78814	13.9663	-3.03167	-16.7
	CDC2	210559_s_at	5.4226	1.92443	15.2797	2.43899	7.7		ABCC3	208161_s_at	7.56357	3.19883	17.8839	-2.91907	-3.8
	FGFR1	210973_s_at	5.3454	1.91765	14.9002	2.4183	4.4		FBLN1	201787_at	6.98534	2.94003	16.5968	-2.80433	-9.1
	ELF4	31845_at	5.03679	2.59612	9.772	2.3325	5.2		HSD3B2	215665_at	6.82557	3.8084	12.2331	-2.77095	-4.8
	TYMS	202589_at	4.61127	2.39406	8.88189	2.20516	4.6		IGFBP6	203851_at	6.51374	4.04715	10.4836	-2.70349	-9.1
	STK6	204092_s_at	4.44522	2.09864	9.41559	2.15225	4.7		ABCC3	209641_s_at	6.34245	2.09558	19.196	-2.66504	-3.8
	ENC1	201341_at	4.40651	2.07022	9.37938	2.13964	11.4		ARGBP2	204288_s_at	6.3398	3.24419	12.3893	-2.66444	-5.6
	ANGPT2	211148_s_at	4.30627	2.00943	9.22845	2.10644	4.4		AOX1	205082_s_at	6.1982	3.03825	12.6447	-2.63185	-6.7
	APOBEC3B	206632_s_at	3.85201	1.93497	7.66836	1.94561	10.8		EPHX2	209368_at	6.04498	3.64432	10.0271	-2.59574	-3.7
	CCNB2	202705_at	3.65108	2.26788	5.8779	1.86832	8.9		FBLN1	202995_s_at	6.02261	4.00877	9.04811	-2.59039	-9.1
	KIAA0186	206102_at	3.60995	1.62817	8.00392	1.85198	7.1		CXCL12	209687_at	5.37437	2.68206	10.7693	-2.4261	-14.3
	SPP1	209875_s_at	3.51952	1.41055	8.78168	1.81538	20.9		CYP11B1	214610_at	5.25363	2.41361	11.4354	-2.39331	-6.3
	CCNE1	213523_at	3.29241	2.15603	5.02773	1.71914	10.4		KIAA1024	215081_at	5.08549	2.10079	12.3107	-2.34639	-12.5
	BUB1B	203755_at	3.27716	1.81416	5.91998	1.71245	4.9		CDKN1C	213182_x_at	4.87915	2.53167	9.40332	-2.28663	-5
	H2AFZ	213911_s_at	3.24029	2.26652	4.63243	1.69612	3.3		CDKN1C	219534_x_at	4.80599	2.42927	9.50804	-2.26483	-5
	GGH	203560_at	3.21659	2.03849	5.07555	1.68553	7.2		ALAS1	205633_s_at	4.39294	2.38032	8.10729	-2.13519	-6.7
	H2AFZ	200853_at	3.01175	1.93709	4.6826	1.5906	3.3		SEMA6A	220454_s_at	4.27343	3.41186	5.35255	-2.09539	-3.7
	HMGB2	208808_s_at	2.82679	1.88314	4.24329	1.49916	3.5		CDKN1C	216894_x_at	4.1074	2.13759	7.89242	-2.03823	-5
	KIF11	204444_at	2.79476	1.06921	7.30511	1.48273	6.7		PTHR1	205911_at	3.88642	2.96412	5.0957	-1.95844	-10
	MGC5576	201764_at	2.7185	1.615	4.57602	1.44281	3.4		PNUTL2	210657_s_at	3.83035	2.4066	6.0964	-1.93748	-7.7
	SMC4L1	201664_at	2.68671	1.93138	3.73744	1.42584	5.3		IGF1	209540_at	3.57716	1.59853	8.00492	-1.83882	-3.6
	ELF4	203490_at	2.6159	1.49857	4.5663	1.38731	5.2		MYO7A	208189_s_at	3.2729	1.61247	6.64316	-1.71057	-3.4
	MAD2L1	203362_s_at	2.5948	0.895452	7.5191	1.37562	4		CREBL2	201990_s_at	3.17836	2.34577	4.30647	-1.66828	-3.6
	ENC1	201340_s_at	2.49653	1.25943	4.9488	1.31992	11.4		PTGDS	211748_x_at	3.02894	1.13564	8.07872	-1.59881	-5.6
	P4HA2	202733_at	2.44739	1.42413	4.20588	1.29124	3.4		PNUTL2	210348_at	2.90073	1.73264	4.85631	-1.53642	-7.7
	FAP	209955_s_at	2.30677	1.29006	4.12476	1.20587	6.2		CDKN1C	213348_at	2.79979	1.6721	4.68801	-1.48532	-5
	SMC4L1	201663_s_at	2.152	1.30879	3.53846	1.10568	5.3		BRE	212645_x_at	2.68538	1.58827	4.54032	-1.42512	-5.3
	WEE1	212533_at	2.12559	1.1708	3.85901	1.08786	5.5		SEMA6A	215479_at	2.63969	1.86299	3.74019	-1.40037	-3.7
	CDKN3	209714_s_at	2.04854	1.26732	3.31131	1.03459	6.8		PTGDS	212187_x_at	2.62855	0.804499	8.58829	-1.39427	-5.6
	UBE2C	202954_at	2.03023	1.51564	2.71952	1.02164	32.4		BRE	211566_x_at	2.62399	1.62042	4.24911	-1.39176	-5.3
	CNAP1	201774_s_at	1.90559	1.42245	2.55285	0.930241	4.1		PRKCA	213093_at	2.61865	1.71692	3.99398	-1.38883	-4.2
	FGFR1	211535_s_at	1.88371	0.765721	4.63399	0.913573	4.4		CD14	201743_at	2.58717	1.71124	3.91146	-1.37137	-5.6
	CSRP2	211126_s_at	1.82529	0.980541	3.39782	0.868129	3.4		SELENBP1	214433_s_at	2.4873	1.34075	4.61433	-1.31458	-4.3
	KIAA0101	211713_x_at	1.57849	0.77822	3.20172	0.658549	28.2		PHYHIP	205325_at	2.43267	1.38467	4.27385	-1.28254	-5.3
	WEE1	215711_s_at	1.56756	0.805298	3.05134	0.64852	5.5		CREBL2	201989_s_at	2.42012	1.72912	3.38727	-1.27508	-3.6
	TOMM34	201870_at	1.28996	1.04176	1.5973	0.367328	8.7		STAB1	38487_at	2.39001	1.83057	3.12041	-1.25701	-3.7
	FGFR1	207822_at	1.26364	0.739596	2.159	0.337586	4.4		ALDH3A2	202054_s_at	2.38311	1.68176	3.37693	-1.25284	-3.6
	FGFR1	222164_at	1.22442	0.853887	1.75575	0.292102	4.4		PDK2	202590_s_at	2.37318	1.86596	3.01828	-1.24682	-4
	IGF1	209542_x_at	1.20583	0.455376	3.19304	0.270029	-3.6		DNASE1L3	205554_s_at	2.37234	1.4723	3.8226	-1.24631	-6.7
	SMC4L1	215623_x_at	1.16289	0.71047	1.90341	0.217715	5.3		PRKCA	215195_at	2.32813	1.2916	4.19648	-1.21917	-4.2
	FBLN1	207834_at	1.09718	0.462599	2.60224	0.133795	-9.1		IGF1	209541_at	2.29383	0.643955	8.17088	-1.19776	-3.6
	TWIST1	213943_at	1.09312	0.643234	1.85765	0.128448	8.4		SLC9A3R1	201349_at	2.27145	1.54132	3.34744	-1.18361	-4.3
	---	207835_at	1.07348	0.495633	2.32505	0.102302	-9.1		CHAD	206869_at	2.25318	1.05381	4.81756	-1.17196	-7.1
	FGFR1	207937_x_at	1.06766	0.789255	1.44427	0.0944535	4.4		MYO7A	211103_at	2.20788	1.06276	4.58685	-1.14266	-3.4
	CSRP2	207030_s_at	1.06205	0.541968	2.08121	0.0868522	3.4		CXCL12	203666_at	2.16267	1.39172	3.36069	-1.11281	-14.3
									RARRES3	204070_at	2.15757	1.43079	3.25352	-1.10941	-4.8
									---	213183_s_at	2.10845	1.40822	3.15687	-1.07618	-5
									MAP3K5	203836_s_at	2.09484	1.30349	3.36661	-1.06684	-3.1
									LMOD1	211562_s_at	2.0009	0.782596	5.11579	-1.00065	-5.6
									MYO7A	33197_at	1.94666	1.51834	2.4958	-0.960998	-3.4
									MAP3K5	203837_at	1.92873	1.31437	2.83024	-0.947649	-3.1
									STAB1	204150_at	1.91388	1.45997	2.50892	-0.936503	-3.7
									TMOD1	203662_s_at	1.88979	0.518274	6.89077	-0.918227	-14.3
									ALDH3A2	202053_s_at	1.8656	1.10179	3.15891	-0.899638	-3.6
									C9orf13	213247_at	1.81715	0.560505	5.89117	-0.861677	-10
									IGF1	211577_s_at	1.80819	1.10963	2.94654	-0.854547	-3.6
									---	203070_at	1.78193	0.930702	3.41171	-0.833443	-10
									BRE	205550_s_at	1.74932	1.1367	2.69211	-0.806794	-5.3
									COBLL1	215393_s_at	1.74859	1.14944	2.66005	-0.80619	-3.8
									CREBL2	201988_s_at	1.74374	1.1065	2.74797	-0.802187	-3.6
									ADH1A	207820_at	1.73574	1.08141	2.78599	-0.795549	-25
									GPX3	214091_s_at	1.69132	1.13112	2.52899	-0.758154	-6.3
									GYPC	202947_s_at	1.68203	1.24685	2.26911	-0.750208	-3
									PDK2	213724_s_at	1.63807	0.855308	3.13722	-0.712001	-4
									COBLL1	203642_s_at	1.58798	1.15409	2.18501	-0.667195	-3.8
									CRLF1	206315_at	1.55293	0.798812	3.01896	-0.634991	-3
									ALDH3B1	205640_at	1.54928	0.833427	2.87999	-0.631595	-4.3
									GPX3	201348_at	1.53349	1.01135	2.32519	-0.616818	-6.3
									FGFR1	215404_x_at	1.49323	1.06175	2.10006	-0.57844	4.4
									ABCC3	214979_at	1.45626	0.725785	2.92195	-0.542272	-3.8
									TYMS	217684_at	1.44052	0.546898	3.79432	-0.526592	4.6
									TMOD1	203661_s_at	1.43821	0.893337	2.31541	-0.524272	-14.3
									---	204486_at	1.42703	0.435139	4.67992	-0.513016	-6.3
									FBP1	209696_at	1.32572	0.967753	1.8161	-0.406777	-4.3
									ALDH3A2	210544_s_at	1.28213	0.844665	1.94616	-0.35854	-3.6
									COBLL1	203641_s_at	1.24899	0.814691	1.9148	-0.320758	-3.8
									ALDH3B1	211004_s_at	1.24458	0.863432	1.79399	-0.315663	-4.3
									COBLL1	211032_at	1.22866	0.468067	3.22517	-0.297081	-3.8
									---	219533_at	1.20017	0.435029	3.31108	-0.263242	-5
									PRKCA	206923_at	1.18841	0.579028	2.43914	-0.249039	-4.2
									MYO7A	211104_s_at	1.16154	0.587579	2.29616	-0.216038	-3.4
									PTGDS	211663_x_at	1.16111	0.592611	2.27497	-0.215504	-5.6
									PDGFRA	211533_at	1.14991	0.470049	2.81309	-0.201519	-5.9
									---	208080_at	1.06654	0.515674	2.20585	-0.0929326	4.7
									PDGFRA	215305_at	1.01862	0.571842	1.81446	-0.0266136	-5.9
									---	215194_at	1.00886	0.685911	1.48386	-0.0127238	-4.2
