# Supplementary material for: Gene Expression Profiling of Childhood Adrenocortical Tumors
Source: Oxford University Press journal article supplement (doi:10.1158/0008-5472.can-06-3767), 2007-01-15
Supplement: 00085472can063767-sup-cr_west_suppl_table_s5.xls [file 00085472can063767-sup-cr_west_suppl_table_s5.xls]

## Sheet: SuppTable-ACCvsAdenoma
Table S5 West et al.	Upregulated in ACC relative to Adenoma						Downregulated in ACC relative to Adenoma
	Probe Set ID	Gene	Ratio	95% CI			Probe Set ID	Gene	Ratio	95% CI
	215441_at	---	8.78052	2.49045	30.9573		205719_s_at	PAH	10.7232	2.64913	43.4059
	205598_at	TRIP	7.29496	3.49111	15.2434		210982_s_at	HLA-DRA	9.63519	4.03037	23.0344
	219537_x_at	DLL3	5.05256	3.27757	7.78883		207002_s_at	PLAGL1	7.4491	2.75533	20.1388
	216947_at	---	4.57287	2.08015	10.0527		214610_at	CYP11B1	6.72429	2.65354	17.0399
	220674_at	FLJ22814	4.52672	2.08949	9.80676		211991_s_at	HLA-DPA1	5.98827	3.5936	9.97868
	219727_at	DUOX2	3.80271	2.21888	6.5171		207066_at	HRC	5.81143	3.23149	10.4511
	203866_at	FLJ10458	3.41188	1.74549	6.66917		208894_at	HLA-DRA	5.06807	2.51196	10.2252
	213877_x_at	TCEB2	3.24199	1.95889	5.36552		219436_s_at	EMCN	4.54693	2.57536	8.02784
	206954_at	WIT-1	3.15939	1.45136	6.87751		214551_s_at	CD7	4.21315	1.53663	11.5517
	201579_at	FAT	2.95206	1.49764	5.81891		215193_x_at	HLA-DRB1	4.15245	2.40836	7.15959
	217277_at	---	2.62086	1.62568	4.22525		209312_x_at	HLA-DRB1	3.66263	2.19667	6.1069
	220011_at	MGC2603	2.2269	1.64348	3.01742		201137_s_at	HLA-DPB1	3.52422	1.62399	7.64793
	208824_x_at	PCTK1	1.93162	1.43509	2.59994		203381_s_at	APOE	3.45515	1.7619	6.77569
	209844_at	HOXB13	1.90379	1.42708	2.53973		202953_at	C1QB	3.26776	1.75016	6.1013
	215380_s_at	C7orf24	1.86658	1.46697	2.37506		204670_x_at	HLA-DRB1	3.10755	1.44869	6.66593
	206817_x_at	TNRC4	1.83012	1.33906	2.50125		215972_at	---	2.98831	1.53626	5.81281
	202900_s_at	NUP88	1.78344	1.37459	2.31389		203669_s_at	DGAT1	2.9322	1.68534	5.10151
	51176_at	CRSP8	1.77312	1.20506	2.60896		208944_at	---	2.65765	1.90047	3.7165
	220009_at	RNF127	1.74492	1.40104	2.17321		221087_s_at	APOL3	2.65139	1.65957	4.23595
	220367_s_at	SAP130	1.6765	1.39207	2.01904		204342_at	SLC25A24	2.55925	1.38395	4.73265
	202251_at	PRPF3	1.58839	1.23407	2.04444		219388_at	TFCP2L3	2.47379	1.70629	3.58651
	218485_s_at	SLC35C1	1.52193	1.02524	2.25925		201885_s_at	DIA1	2.28289	1.66557	3.12901
	217754_at	DDX56	1.45465	1.196	1.76922		219777_at	GIMAP6	2.22883	1.42786	3.47911
							203158_s_at	GLS	2.01787	1.30624	3.1172
							200914_x_at	KTN1	1.9607	1.44875	2.65355
							211256_x_at	BTN2A1	1.8875	1.51644	2.34935
							202181_at	KIAA0247	1.75944	1.42854	2.16699
							217202_s_at	GLUL	1.55006	1.21517	1.97725
							215493_x_at	BTN2A1	1.51178	1.27371	1.79435
